# Supplementary material for: Template-free synthesis of monolithic carbon xerogels with hierarchical porosity from resorcinol and formaldehyde via hydrothermal reaction
Source: Royal Society of Chemistry journal article supplement (doi:10.1039/c8ra02806k), 2018-01-01
Supplement: c8ra02806k1.pdf [file c8ra02806k1.pdf]

## **Electronic Supplementary Information (ESI)**

### **Template-Free Synthesis of Monolithic Carbon Xerogels with Hierarchical Porosity from Resorcinol and Formaldehyde via Hydrothermal Reaction**

G. Cho, J. Y. Lee and T. H. Yoon\*

School of Materials Science and Engineering, Gwangju Institute of Science and Engineering, Gwangju, 61005, South Korea.

\* To whom correspondence should be addressed (thyoon@gist.ac.kr, Fax: +82-62-715-2304, Tel:+82-62-715-2307)

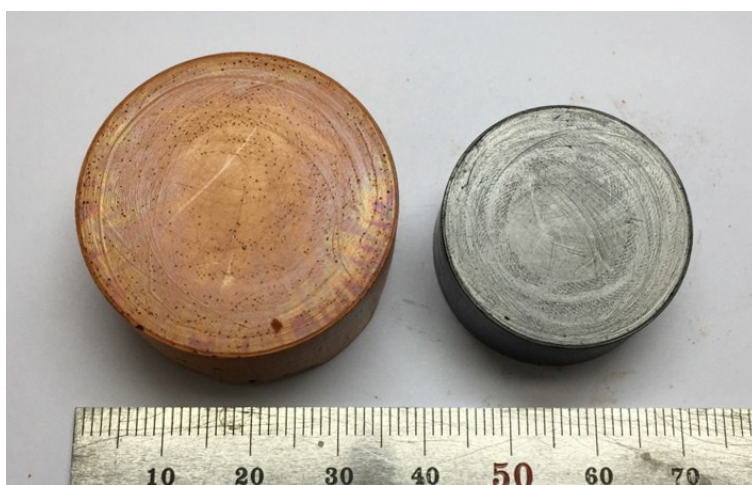

Fig. S1. Photo of monolithic RF (left) and carbon (right) xerogels.

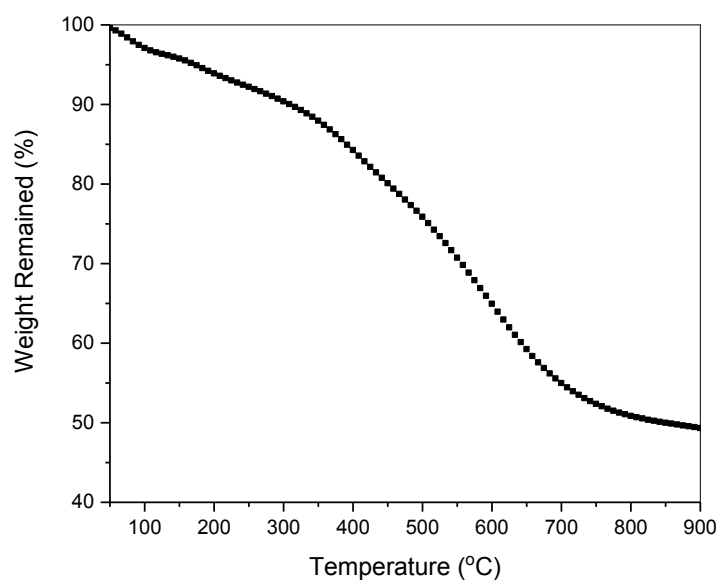

Fig. S2. TGA of monolithic carbon xerogel of 45-10k under N<sub>2</sub> flow at 10°C/min.

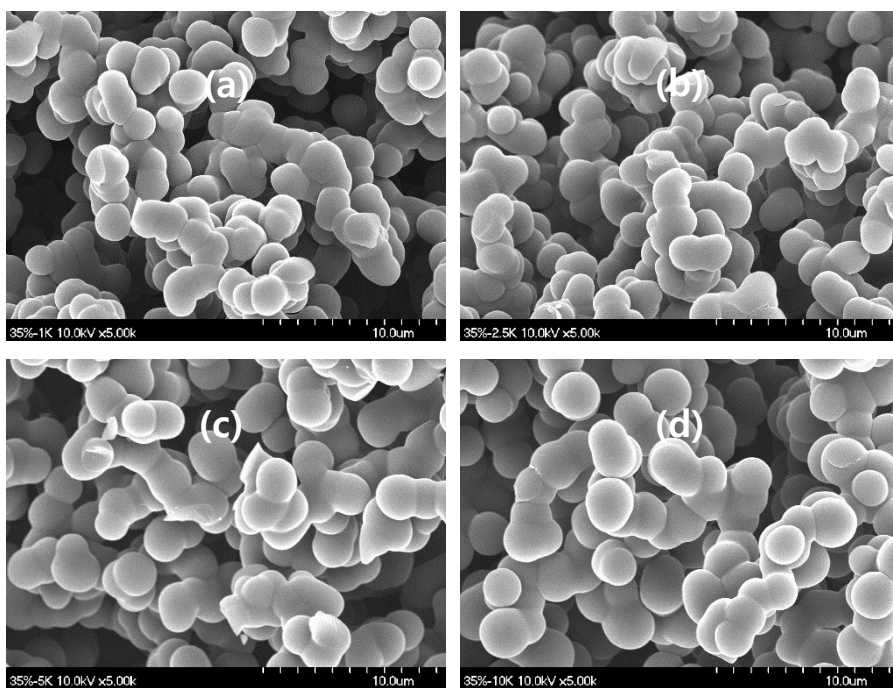

Fig. S3. SEM micrographs from monolithic carbon xerogels of a) 35-1k, b) 35-2.5k, c) 35-5k, and d) 35-10k.

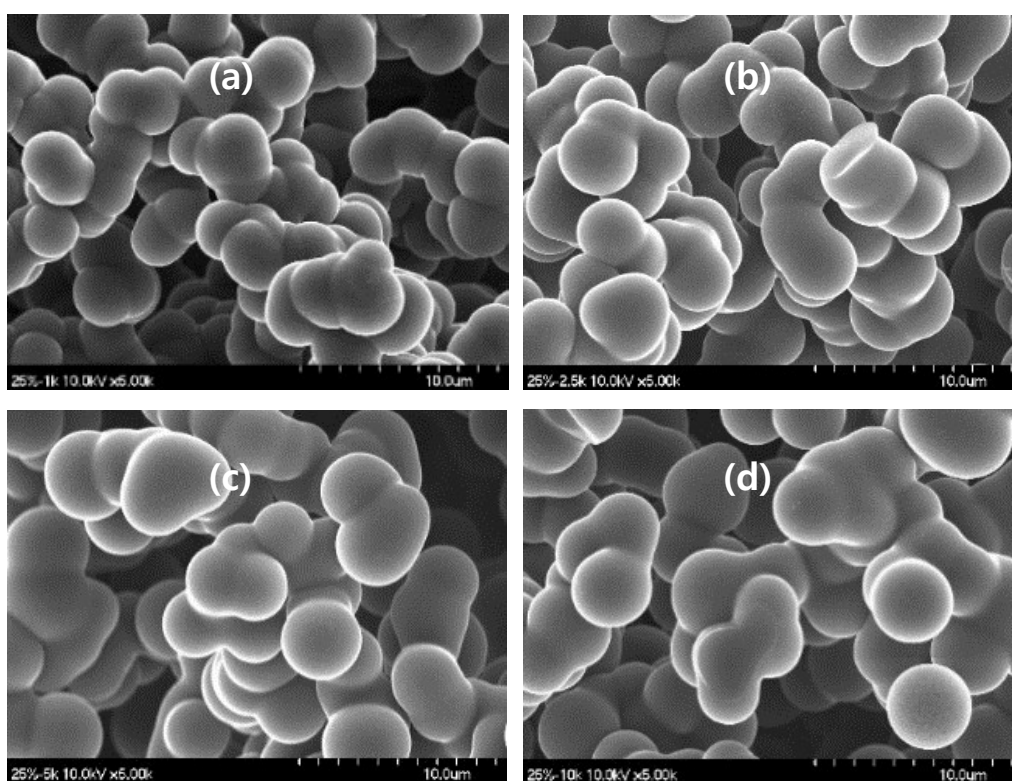

Fig. S4. SEM micrographs from monolithic carbon xerogels of a) 25-1k, b) 25-2.5k, c) 25-5k, and d) 25-10k.

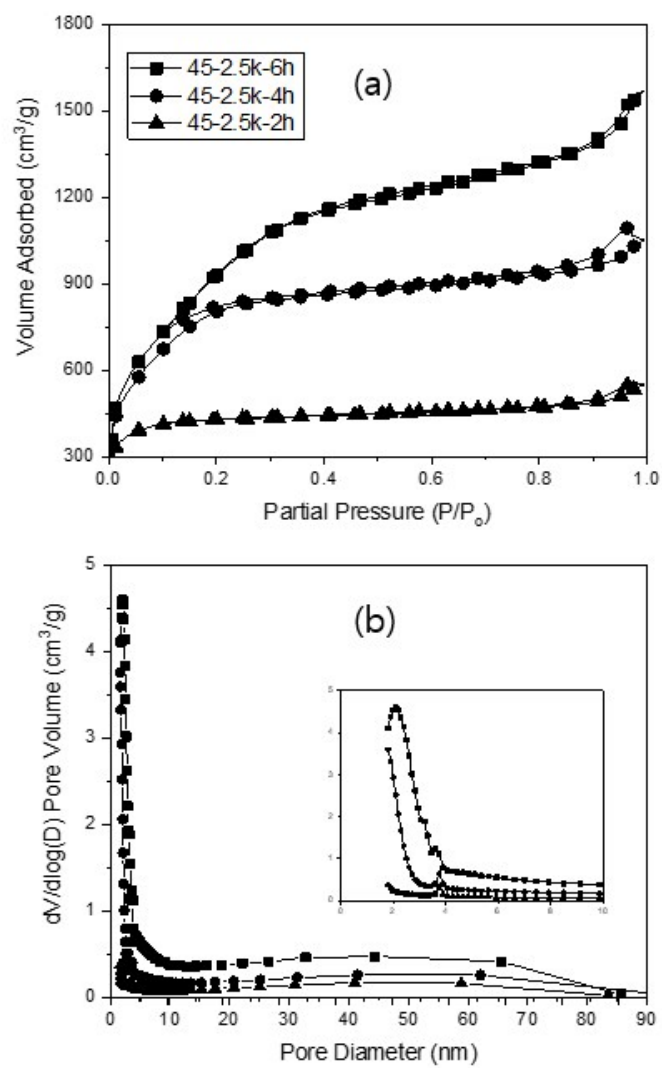

Fig. S5. Nitrogen isotherms (a) and pore size distribution (b) of monolithic carbon xerogels of 45-2.5k upon 2, 4, or 6 h activation.

Table S1. Burn off ratio (%) of monolithic carbon xerogels from R/W=45 upon activation.

|    | 1k  | 2.5k | 5k | 10k |
|----|-----|------|----|-----|
| 2h | 37  | 33   | 31 | 31  |
| 4h | 61  | 58   | 57 | 56  |
| 6h | 100 | 88   | 83 | 81  |

Table S2. Crack generation of monolithic carbon xerogels from R/W=45 upon activation.

|    | 1k | 2.5k | 5k | 10k |
|----|----|------|----|-----|
| 2h | SC | NC   | NC | NC  |
| 4h | LC | SC   | NC | NC  |
| 6h | NA | LC   | SC | NC  |

NA: not applicable, NC: no crack, SC: small crack, LC: large crack



Table S3. Characteristics of monolithic carbon xerogels of 45-2.5k upon activation

| Sample     | S <sup>a</sup> (m <sup>2</sup> g <sup>-1</sup> ) | V <sub>total</sub> <sup>b</sup> (cm <sup>3</sup> g <sup>-1</sup> ) | V <sub>micro</sub> <sup>c</sup> (cm <sup>3</sup> g <sup>-1</sup> ) | D <sub>p</sub> <sup>d</sup> (nm) |
|------------|--------------------------------------------------|--------------------------------------------------------------------|--------------------------------------------------------------------|----------------------------------|
| 45-2.5k    | 668                                              | 0.333                                                              | 0.239                                                              | 1.99                             |
| 45-2.5k-2h | 1468                                             | 0.719                                                              | 0.534                                                              | 1.96                             |
| 45-2.5k-4h | 2650                                             | 1.400                                                              | 1.053                                                              | 2.11                             |
| 45-2.5k-6h | 3163                                             | 2.012                                                              | 1.394                                                              | 2.54                             |

<sup>a</sup>Specific surface area by BET (Brunauer-Emmett-Teller) method.

<sup>b</sup>Total pore volume obtained by total single point adsorption of the pores less than 300nm at  $P/P_0=0.99$ .

<sup>c</sup>Micro-pore volume obtained by  $t$ -plot method.

<sup>d</sup>Pore size distribution calculated by BJH(Barrett-Joyner-Halenda) method.
